# Supplementary material for: Unique Variant Spectrum in a Jordanian Cohort with Inherited Retinal Dystrophies
Source: MDPI journal article supplement (doi:10.3390/genes12040593), 2021-04-19
Supplement: s1 [file s1]

# Supplementary Material

## Unique Variant spectrum in a Jordanian cohort with inherited retinal dystrophies

**Bilal Azab<sup>1, 2†</sup>, Zain Dardas<sup>2, 3†</sup>, Dunia Aburizeg<sup>2</sup>, Muawyah Al-Bdour<sup>4</sup>, Mohammed Abu-Ameerh<sup>4</sup>, Tareq Saleh<sup>5</sup>, Raghda Barham<sup>6</sup>, Ranad Maswadi<sup>7</sup>, Nidaa A Ababneh<sup>6</sup>, Mohammad Alsalem<sup>8</sup>, Hana Zouk<sup>9, 10</sup>, Sami Amr<sup>11</sup>, Abdalla Awidi<sup>6\*\*</sup>**

<sup>1</sup> Department of Human and Molecular Genetics, School of Medicine, Virginia Commonwealth University, Richmond, VA 23298-0565, USA

<sup>2</sup> Department of Pathology and Microbiology and Forensic Medicine, School of Medicine, The University of Jordan, Amman 11942, Jordan; zain.dardas@bcm.edu (Z.D.); dunia.aburizeg@gmail.com (D.A.)

<sup>3</sup> Department of Molecular and Human Genetics, Baylor College of Medicine, Houston, TX 77030, USA

<sup>4</sup> Department of Ophthalmology, Jordan University Hospital, The University of Jordan, Amman 11942, Jordan; bdourjo@yahoo.com (M.A.-B.); mohammd\_73@yahoo.com (M.A.-A.)

<sup>5</sup> Department of Basic Medical Sciences, Faculty of Medicine, The Hashemite University, Zarqa 13115, Jordan; tareq@hu.edu.jo

<sup>6</sup> Cell Therapy Center, The University of Jordan, Amman 11942, Jordan; raghda.barham@gmail.com (R.B.); nidaaanwar@gmail.com (N.A.A.)

<sup>7</sup> Department of Ophthalmology, St Thomas' Hospital, London SE1 7EH, UK; Ranad.maswadi@gstt.nhs.uk

<sup>8</sup> Department of Anatomy and Histology, School of Medicine, The University of Jordan, Amman 11942, Jordan; dralsalem@gmail.com

<sup>9</sup> Laboratory for Molecular Medicine, Partners HealthCare Personalized Medicine, Cambridge, MA 02139, USA; hzouk@bwh.harvard.edu

<sup>10</sup> Department of Pathology, Massachusetts General Hospital/Harvard Medical School, Boston, MA 02114, USA

<sup>11</sup> Department of Pathology, Brigham and Women's Hospital, Harvard Medical School, Boston, MA 02115, USA; samr@bwh.harvard.edu

† These authors contributed equally to this work.

\* Correspondence: azabbm@mymail.vcu.edu (B.A.); abdalla.awidi@gmail.com (A.A.); Tel.: +96-279-840-2240 (B.A.); Tel.: +96-279-527-7455 (A.A.)

**Table S4:** Primers used for the validation and segregation analysis of the identified variants.

| Gene           | Forward primer           | Reverse primer          | Amplicon size | Tm. |
|----------------|--------------------------|-------------------------|---------------|-----|
| <i>TULP1</i>   | ACTTATGCCCTGCTCCAAGT     | GGCATGGATCGAGGCATGTA    | 600           | 60  |
| <i>C8orf37</i> | AGTCTGCGCTGAGTGAAGAG     | CCGAACCTCTGTCCCTGCATA   | 569           | 60  |
| <i>CRB1</i>    | ACATGCATCCCTCACTTCCA     | ACAAGGTTGGCTTTCACACC    | 681           | 60  |
| <i>IMPDH1</i>  | GAGCATCGCATAGGACTAGTT    | GCAGAAGTTTGAACAGGGCT    | 686           | 60  |
| <i>AHI1</i>    | CAGTGCAAATGGGGTATAAAA    | ACACATGTACTGAGAGGCTC    | 638           | 60  |
| <i>CEP290</i>  | TCCTTTCATATTCAAGTGTACCGA | TGAAATACTAAATGCGGCACAAA | 613           | 60  |
| <i>RDH12</i>   | TGGTACCTGCTGAATCCTGG     | GCATAACCAACAGCGACAGT    | 610           | 60  |
| <i>MAK</i>     | AGCAACTTAGGGACAAGAGTACT  | ATTTGTCTCCAGCCCCACTC    | 414           | 60  |
| <i>RP1L1</i>   | TTTGAGCAGGAGTCGGATGT     | CTTCCACCTGCACTTCATCC    | 475           | 60  |
| <i>TULP1</i>   | ATGGAGGAGAGAGTGACCTT     | ATGAAGATGTCCAGGCCACA    | 441           | 60  |
| <i>RDH12</i>   | TGGTACCTGCTGAATCCTGG     | GCATAACCAACAGCGACAGT    | 610           | 60  |
| <i>CDHR1</i>   | CTGTCACCACCACTTACCCT     | GGGCAAGTTTGAGGAGATGC    | 472           | 60  |
| <i>CRB1</i>    | ACATGCATCCCTCACTTCCA     | ACAAGGTTGGCTTTCACACC    | 681           | 60  |
| <i>CNGB1</i>   | CAGAGACACAGAGGACGAGG     | GGCAGAACTTCCCGTCAGTA    | 445           | 60  |
| <i>CERKL</i>   | GCCATTGGGGAGTTATTCCT     | TCTGTGTTGGTGGAGATGGA    | 456           | 60  |
| <i>ERCC6</i>   | TACCTGTTGCCTGATGTCCC     | GTTAGTGCTGCCATGAGACG    | 484           | 60  |
| <i>PRSS56</i>  | CCGAATGAGCTTCTGTGGAC     | CCCTTTGAAAGAGCAGGCAG    | 454           | 60  |
| <i>KCNJ13</i>  | CAGGGAGAAGGAGAATGCAG     | AGCATTCCCAAGAAAGCAGA    | 455           | 60  |
| <i>RGR</i>     | TCTTCTGTGTGACCTTGGCT     | CCCAAGGTTGCGGTAATGG     | 699           | 60  |
| <i>PITPNM3</i> | CTCACTGCAAACCTCCACCTC    | CTCTAGCCCAAGTCTGACCC    | 716           | 60  |
| <i>HMCN1</i>   | GGCACTTGATGAGAACTTCCC    | GGAAGACTGAAGGTGAGGCA    | 707           | 60  |
| <i>OPN1SW</i>  | TTTCCCCCAGACTCCTCTTT     | AGCTTTCATGGGCACTGTCT    | 323           | 60  |
| <i>ROM1</i>    | TGACACCTCTGCATTCCCTT     | GTAACCAGTCTCTCAGCCACT   | 750           | 60  |
| <i>CAPN5</i>   | CACAGCCTCCTCAGTCTGAC     | GCCCAGTAGATGCCCAGAG     | 754           | 60  |
| <i>COL2A1</i>  | ACCCAAGCTGAGGAATCCC      | TGAGTTGGGCAGAAGAGGAG    | 779           | 60  |
| <i>COL9A1</i>  | AGCTGAATGATCGTTTACCAGA   | TGCTACCTCCCTCCCCGT      | 769           | 60  |
| <i>PAX2</i>    | ACATCCCATGCCTCTCAACA     | ATTCTGGGCAACTTGGGAGA    | 764           | 60  |
| <i>ADGRV1</i>  | AAAATTTGCTTATGTTGCCCA    | CCAGTAGAGAATGGCAAGC     | 589           | 60  |

**Table S5:** Clinical features of inherited retinal dystrophy (IRD) cohort.

| Family ID | Consanguinity | Implicated gene<br>GeneBank Accession No.<br>[DCVs] | Patient ID | Age (yrs) |       | BCVA         |            | CORNEA | LENS      |           | IOP  |      | Fundus exam                           |
|-----------|---------------|-----------------------------------------------------|------------|-----------|-------|--------------|------------|--------|-----------|-----------|------|------|---------------------------------------|
|           |               |                                                     |            | At exam   | Onset | OD           | OS         |        | OD        | OS        | OD   | OS   |                                       |
| IRD01     | No            | -                                                   | 010210     | 42        | 5     | 0.4          | 0.4        | Clear  | No L.O    | No L.O    | Soft | Soft | Scattered bony spicules               |
|           |               |                                                     | 010208     | 51        | 10    | HM           | HM         | Clear  | L.O       | L.O       | Soft | Soft | Bony spicules, Pale disk              |
| IRD02     | Yes           | <i>CLRN1</i><br>NM_00119579<br>4.1<br>[c.433+1G>A]  | 020416     | 48        | 5     | HM           | CF closely | Clear  | NS+1      | PSCC+2    | 14   | 12   | Bony spicules, Pale disk              |
|           |               |                                                     | 020417     | 54        | 7     | NLP          | 0.4        | Clear  | Clear     | PCIOL     | 19   | 14   | RP triad                              |
|           |               |                                                     | 020418     | 44        | 6     | CF at 1 m    | CF at 1.5m | Clear  | NS+1+PSCC | NS+1+PSCC | 14   | 14   | RP triad                              |
|           |               |                                                     | 020419     | 48        | 7     | CF at 2 m    | CF at 2 m  | Clear  | PSCC+2    | PSCC+2    | Soft | Soft | RP triad                              |
|           |               | <i>ABCA4</i><br>NM_000350.2<br>[c.5460+1G>A]        | 020407     | 49        | 10    | CF at 1.25 m | 0.05       | Clear  | No L.O    | No L.O    | Soft | Soft | RP triad                              |
|           |               |                                                     | 020408     | 37        | 10    | HM           | HM         | Clear  | Clear     | Clear     | Soft | Soft | RP triad                              |
|           |               |                                                     | 020506     | 11        | 9     | 0.1          | 0.1        | Clear  | No L.O    | No L.O    | Soft | Soft | Attenuated arterioles and RPE changes |

Table S5 Abbreviations: DCVs: Disease-causing variants, BCVA: Best Corrected Visual Acuity, IOP: Intraocular Pressure, L.O: Lenticular opacity, HM: Hand Motion, CF: Counting Fingers, NS: Nuclear Sclerosis, PSCC: Posterior subcapsular Cataract, PCIOL: Posterior Chamber Intraocular Lens, IOL: Intraocular Lens, LP: Light Perception, NLP: No Light Perception, PCO: Posterior capsule opacification, PVD: Posterior vitreous detachment, ASCC: Anterior subcapsular cataract, PPA: Peripapillary atrophy, NA: Not Available, CSM: central, steady, maintained. RP triad: Bony spicules, attenuated blood vessels, and pale optic disk.

|       |     |                                              |        |    |    |             |             |       |            |            |      |      |                                                                          |
|-------|-----|----------------------------------------------|--------|----|----|-------------|-------------|-------|------------|------------|------|------|--------------------------------------------------------------------------|
|       |     |                                              | 020507 | 12 | 6  | 0.1         | 0.1         | Clear | Clear      | Clear      | Soft | Soft | Bony spicules, RPE changes                                               |
| IRD03 | No  | <i>CRB1</i><br>NM_201253.2<br>[c.3307G>A]    | 030203 | 15 | 2  | HM          | CF closely  | Clear | Clear      | Clear      | Soft | Soft | RP triad                                                                 |
|       |     |                                              | 030202 | 9  | 2  | CF closely  | CF closely  | Clear | Clear      | Clear      | Soft | Soft | RP triad                                                                 |
| IRD04 | No  | <i>MAK</i><br>NM_00124295.7.1<br>[c.518G>T]  | 040306 | 59 | 33 | 0.5         | 0.1         | Clear | PCIOL      | PCIOL      | Soft | Soft | Bony spicules, Pale disk                                                 |
|       |     |                                              | 040307 | 64 | 30 | HM          | 0.4         | Clear | Sulcus IOL | Sulcus IOL | 15   | 15   | RP triad                                                                 |
| IRD05 | Yes | <i>RPI</i><br>NM_006269.1<br>[c.1126C>T]     | 050406 | 33 | 6  | LP          | NLP         | Clear | PSCC       | Aphakia    | 12   | 12   | RP triad                                                                 |
|       |     |                                              | 050407 | 44 | 6  | LP          | LP          | Clear | Clear      | Clear      | Soft | Soft | RP triad                                                                 |
|       |     |                                              | 050408 | 25 | 6  | HM          | HM          | Clear | No L.O     | No L.O     | Soft | Soft | RP triad                                                                 |
| IRD06 | Yes | <i>RP1L1</i><br>NM_178857.5<br>[c.2088C>A]   | 060408 | 60 | NA | LP          | LP          | Clear | NS+1       | PSCC+2     | 12   | 12   | Bony spicules, Attenuated blood vessels, and extensive asteroid hyalosis |
| IRD07 | Yes | <i>EYS</i><br>NM_00114280.0.1<br>[c.2308C>T] | 070406 | 52 | 5  | HM          | HM          | Clear | PSCC+3     | PSCC+3     | 12   | 12   | RP triad                                                                 |
| IRD08 | Yes | <i>RPI</i><br>NM_006269.1<br>[c.607G>A]      | 080405 | 25 | 6  | 0.4         | 0.3         | Clear | No L.O     | No L.O     | 13   | 13   | RP triad                                                                 |
|       |     |                                              | 080406 | 35 | 5  | HM          | HM          | Clear | PSCC+2     | PSCC+2     | Soft | Soft | RP triad                                                                 |
| IRD09 | Yes | <i>TULP1</i><br>NM_003322.3<br>[c.1081C>T]   | 090413 | 48 | 6  | HM          | LP          | Clear | L.O        | L.O        | Soft | Soft | RP triad                                                                 |
| IRD10 | Yes | <i>RLBP1</i><br>NM_000326.4<br>[c.79delA]    | 100413 | 34 | 1  | CF at 2.5 m | CF at 2.5 m | Clear | Blue dots  | Blue dots  | Soft | Soft | sincRP pigmento                                                          |
|       |     |                                              | 100410 | 30 | 1  | CF at 1m    | CF closely  | Clear | Clear      | Clear      | Soft | Soft | sincRP pigmento                                                          |

|       |     |                                                                 |        |    |    |             |             |       |        |                 |      |      |                                                                                         |
|-------|-----|-----------------------------------------------------------------|--------|----|----|-------------|-------------|-------|--------|-----------------|------|------|-----------------------------------------------------------------------------------------|
|       |     |                                                                 | 100411 | 28 | 1  | 0.05        | 0.05        | Clear | Clear  | Clear           | Soft | Soft | sincRP pigmento                                                                         |
|       |     |                                                                 | 100412 | 26 | 1  | CF closely  | CF at 2m    | Clear | Clear  | Clear           | Soft | Soft | sincRP pigmento                                                                         |
| IRD11 | Yes | <i>CERKL</i><br>NM_001030311.2<br>[c.450_451delA <sup>T</sup> ] | 110406 | 49 | 12 | HM          | HM          | Clear | PSCC   | PSCC            | Soft | Soft | RP triad                                                                                |
| IRD12 | Yes | <i>TULP1</i><br>NM_003322.3<br>[c.1495+2dupT]                   | 120405 | 25 | 6  | 0.05        | 0.05        | Clear | No L.O | No L.O          | Soft | Soft | RP triad                                                                                |
|       |     |                                                                 | 120406 | 27 | 6  | CF at 0.5 m | CF at 0.2 m | Clear | No L.O | No L.O          | 12   | 12   | RP triad, macular hyperpigmentation                                                     |
| IRD13 | Yes | -                                                               | 130404 | 18 | 6  | CF at 1.5 m | CF at 2.0 m | Clear | No L.O | No L.O          | Soft | Soft | RP triad                                                                                |
| IRD14 | Yes | <i>CRB1</i><br>NM_201253.2<br>[c.1733T>A]                       | 140403 | 15 | NA | CF at 0.5 m | CF at 1.25m | Clear | No L.O | No L.O          | 10   | 8    | RP triad                                                                                |
| IRD15 | Yes | -                                                               | 150510 | 37 | 10 | LP          | HM          | Clear | PSCC   | PSCC            | Soft | Soft | RP triad                                                                                |
| IRD16 | No  | <i>CLN3</i><br>NM_001042432.1<br>[c.1000C>T]                    | 160201 | 13 | 6  | HM          | CF closely  | Clear | Clear  | Clear           | Soft | Soft | Minimal bony spicules, ERM, and peripheral retinal flecks                               |
| IRD17 | Yes | <i>RLBP1</i><br>NM_000326.4<br>[c.398delC]                      | 170408 | 60 | 2  | CF closely  | CF closely  | Clear | L.O    | L.O             | Soft | Soft | Yellow-white dots at the level of the RPE and concentrated in the retinal midperiphery. |
| IRD18 | Yes | <i>CERKL</i><br>NM_001030311.2<br>[c.1164_1165delTG]            | 180515 | 41 | 17 | HM          | HM          | Clear | No L.O | No L.O          | NA   | NA   | RP triad with PVD                                                                       |
|       |     |                                                                 | 180517 | 30 | 17 | CF closely  | HM          | Clear | No L.O | No L.O          | 13   | 13   | RP triad with PVD                                                                       |
|       |     |                                                                 | 180526 | 26 | 28 | CF at 2.3 m | CF at 1.5 m | Clear | No L.O | No L.O          | NA   | NA   | RP triad with PVD                                                                       |
|       |     |                                                                 | 180530 | 40 | 15 | LP          | LP          | Clear | No L.O | No L.O          | NA   | NA   | RP triad                                                                                |
| IRD19 | Yes | <i>CRB1</i><br>NM_201253.2<br>[c.1733T>A]                       | 190403 | 40 | NA | CF closely  | NLP         | Clear | L.O    | Mature cataract | 12   | 15   | Pale disk, Attenuated blood vessels                                                     |
| IRD20 | Yes | <i>BBS2</i><br>NM_031885.3<br>[c.944G>A]                        | 200405 | 19 | NA | CF closely  | CF closely  | Clear | Clear  | Clear           | Soft | Soft | Pigmentary changes, RPE atrophy,                                                        |

|       |     |                                               |        |    |    |                   |                      |                  |                      |                        |      |      |                                                                                                                             |
|-------|-----|-----------------------------------------------|--------|----|----|-------------------|----------------------|------------------|----------------------|------------------------|------|------|-----------------------------------------------------------------------------------------------------------------------------|
|       |     |                                               |        |    |    |                   |                      |                  |                      |                        |      |      | and bony<br>spicules                                                                                                        |
|       |     |                                               | 200406 | 9  | NA | 0.2               | 0.2                  | Clear            | Clear                | Clear                  | Soft | Soft | RP triad                                                                                                                    |
| IRD21 | Yes | <i>RDH12</i><br>NM_152443.2<br>[c.379G>T]     | 210406 | 28 | NA | NLP               | HM                   | Clear            | L.O                  | Dense PCO              | Soft | Soft | Severe<br>bony<br>spicules<br>involving<br>the macula,<br>pale disk,<br>attenuated<br>blood<br>vessels                      |
| IRD22 | Yes | <i>RPI</i><br>NM_006269.1<br>[c.607G>A]       | 220404 | 26 | 5  | HM                | HM                   | Clear            | PSCC                 | PSCC                   | 8    | 8    | RP triad                                                                                                                    |
| IRD23 | Yes | -                                             | 230403 | 21 | 13 | 0.3               | 0.2                  | Clear            | L.O                  | L.O                    | 12   | 10   | Small tilted<br>disk,<br>attenuated<br>blood<br>vessels,<br>bony<br>spicules                                                |
| IRD24 | Yes | <i>ABCA4</i><br>NM_000350.2<br>[c.1648G>A]    | 240405 | 20 | 11 | CF<br>at<br>1m    | 0.05                 | Clear            | No L.O               | Congenital<br>cataract | 10   | 10   | RP triad                                                                                                                    |
| IRD25 | Yes | <i>RDH12</i><br>NM_152443.2<br>[c.821T>C]     | 250410 | 54 | 28 | LP                | LP                   | Arcus<br>senilis | PSCC                 | PSCC                   | 10   | 10   | Severe<br>bony<br>spicules<br>involving<br>the macula                                                                       |
| IRD26 | No  | <i>C8orf37</i><br>NM_177965.3<br>[c.155+1G>A] | 260207 | 27 | 18 | HM                | CF<br>at<br>0.5<br>m | Clear            | Clear                | Clear                  | 12   | 12   | Bony spicu<br>les, ERM                                                                                                      |
| IRD27 | Yes | <i>CDHR1</i><br>NM_033100.3<br>[c.338delG]    | 270502 | 26 | 16 | CF<br>at<br>2m    | 0.1                  | Clear            | Clear                | Clear                  | Soft | Soft | Abnormal<br>foveal<br>reflection                                                                                            |
| IRD28 | Yes | <i>CRB1</i><br>NM_201253.2<br>[c.1733T>A]     | 280413 | 48 | NA | CF<br>clos<br>ely | HM                   | Clear            | No L.O               | No L.O                 | 18   | 18   | Severe<br>pigmentary<br>changes,<br>RP triad,<br>and<br>asteroid<br>hyalosis                                                |
| IRD29 | Yes | -                                             | 290407 | 30 | 7  | 0.5               | NLP                  | Clear            | PSCC                 | PSCC                   | Soft | Soft | RP triad                                                                                                                    |
| IRD30 | Yes | -                                             | 300505 | 49 | 5  | 0.2               | NLP                  | Clear            | Blue dot<br>cataract | Blue dot<br>cataract   | 10   | 10   | Bony<br>spicules,<br>pale optic<br>disk,<br>ischemic<br>retina,<br>diffuse<br>white<br>deposits,<br>and<br>atrophic<br>hole |
| IRD31 | Yes | <i>TULP1</i><br>NM_003322.3<br>[c.1087G>A]    | 310404 | 48 | NA | 0.3               | 0.1                  | Clear            | Early<br>PSCC        | Early PSCC             | 15   | 15   | Bony<br>spicules                                                                                                            |

|       |     |                                                                 |        |    |    |                      |                   |                |            |          |      |      |                                                                     |
|-------|-----|-----------------------------------------------------------------|--------|----|----|----------------------|-------------------|----------------|------------|----------|------|------|---------------------------------------------------------------------|
| IRD32 | No  | -                                                               | 320404 | 14 | NA | 0.7                  | 0.6               | Clear          | Clear      | Clear    | 9    | 10   | RP triad                                                            |
|       |     |                                                                 | 320301 | 44 | NA | 0.05                 | 0.1               | Clear          | Early L.O  | PCIOL    | 13   | 9    | RP triad                                                            |
|       |     |                                                                 | 320302 | 40 | NA | 0.05                 | 0.05              | Clear          | PSCC       | PSCC     | 13   | 13   | RP triad                                                            |
| IRD33 | Yes | <i>CRBI</i><br>NM_201253.2<br>[c.2308G>A]                       | 330401 | 17 | 3  | NA                   | NA                | NA             | NA         | NA       | NA   | NA   | NA                                                                  |
|       |     |                                                                 | 330402 | 11 | 3  | NA                   | NA                | NA             | NA         | NA       | NA   | NA   | NA                                                                  |
| IRD34 | No  | -                                                               | 340202 | 4  | 1  | CS<br>M              | CS<br>M           | Clear          | Clear      | Clear    | Soft | Soft | Bony<br>spicules                                                    |
| IRD35 | No  | <i>CERKL</i><br>NM_00103031<br>1.2<br>[c.847C>T/<br>c.481+1G>A] | 350208 | 37 | 18 | LP                   | LP                | Apical<br>scar | L.O        | L.O      | Soft | Soft | Peripheral<br>Bony<br>spicules                                      |
| IRD36 | No  | <i>CLRNI</i><br>NM_00119579<br>4.1<br>[c.323T>C]                | 360203 | 41 | 36 | 0.3                  | CF<br>at<br>2m    | Clear          | PSCC       | PSCC     | Soft | Soft | RP triad                                                            |
| IRD37 | No  | <i>USH2A</i><br>NM_206933.2<br>[c.8917_8918de<br>l]             | 370403 | 53 | NA | 0.2                  | 0.2               | Clear          | PCIOL      | PCIOL    | Soft | Soft | RP triad                                                            |
| IRD38 | Yes | <i>IMPDH1</i><br>NM_000883.3<br>[c.835T>G]                      | 380401 | 28 | 3  | 0.1                  | 0.4               | Clear          | Trace NS   | Trace NS | 14   | 14   | RP triad                                                            |
| IRD39 | Yes | <i>CRBI</i><br>NM_201253.2<br>[c.1844G>T]                       | 390404 | 19 | 4  | CF<br>at<br>1m       | CF<br>at<br>1m    | Clear          | No L.O     | No L.O   | Soft | Soft | RP triad                                                            |
| IRD40 | Yes | -                                                               | 400502 | 26 | 12 | 0.5                  | 0.1               | Clear          | No L.O     | No L.O   | Soft | Soft | RP triad                                                            |
|       |     |                                                                 | 400503 | 27 | 12 | CF<br>at<br>0.5<br>m | CF<br>clos<br>ely | Clear          | No L.O     | No L.O   | Soft | Soft | RP triad                                                            |
| IRD41 | Yes | <i>C8orf37</i><br>NM_177965.3<br>[c.155+1G>A]                   | 410502 | 35 | 8  | 0.05                 | CF at<br>2.75m    | Clear          | Clear      | Clear    | 12   | 11   | RP triad<br>and PPA                                                 |
| IRD42 | No  | -                                                               | 420204 | 18 | NA | HM                   | HM                | Clear          | Post polar | Clear    | Soft | Soft | RP triad                                                            |
| IRD43 | No  | -                                                               | 430211 | 51 | NA | NLP                  | NLP               | Clear          | Clear      | Clear    | Soft | Soft | RP triad                                                            |
| IRD44 | No  | -                                                               | 440210 | 51 | 40 | CF<br>at<br>1m       | NLP               | Clear          | Clear      | Clear    | 15   | 13   | Scattered<br>bony<br>spicules,<br>pigmentary<br>changes,<br>and PVD |

[illegible]



|       |     |                                                   |        |    |    |    |    |       |        |        |      |      |          |
|-------|-----|---------------------------------------------------|--------|----|----|----|----|-------|--------|--------|------|------|----------|
|       |     |                                                   | 550404 | 16 | NA | NA | NA | NA    | NA     | NA     | NA   | NA   | RP triad |
| IRD56 | Yes | <i>CNGB1</i><br><b>NM_001297.4</b><br>[c.2662G>A] | 560403 | 32 | NA | LP | HM | Clear | No L.O | No L.O | Soft | Soft | RP triad |
|       |     |                                                   | 560404 | 34 | NA | HM | HM | Clear | PSCC   | PSCC   | 12   | 12   | RP triad |

**Table S6.** Candidate variants with low evidence of pathogenicity identified in Jordanian IRD cohort.

| Family ID | Gene           | Variant coordinate hg19 | HGVS variant nomenclature               | dbSNP ID     | gnomAD     | Zygosity | Segregation analysis |            | ClinVar* | In-silico predictions<br>SIFT, PP, MT | Reference |
|-----------|----------------|-------------------------|-----------------------------------------|--------------|------------|----------|----------------------|------------|----------|---------------------------------------|-----------|
|           |                |                         |                                         |              |            |          | Affected             | Unaffected |          |                                       |           |
| IRD13     | <i>ERCC6</i>   | chr10:50724268          | NM_170753.3: c.893G>A; p.(Trp298*)      | rs1379548348 | 0.00005437 | Het      | 1/2                  | 1/3        |          | T, B                                  | Novel     |
| IRD15     | <i>PRSS56</i>  | chr2:233387508          | NM_001195129.1: c.643G>C; p.(Glu215Gln) | rs1220306609 | 0.00002299 | Hom      | 1/2                  | 0/2        |          | T, B                                  | Novel     |
| IRD23     | <i>KCNJ13</i>  | chr2:233636036          | NM_002242.4: c.37C>G; p.(Leu13Val)      | rs1262517271 | NA         | Het      | 1/1                  | 2/3        |          | T, B, DC                              | Novel     |
| IRD29     | <i>RGR</i>     | chr10:86008710          | NM_002921.3: c.281C>T; p.(Ala94Val)     |              | NA         | Het      | 1/1                  | 2/3        |          | T, B, DC                              | Novel     |
| IRD30     | <i>PITPNM3</i> | chr17:6381326           | NM_031220.3: c.869G>A; p.(Ser290Asn)    |              | NA         | Het      | 1/1                  | 1/3        |          | D, P, DC                              | Novel     |
| IRD30     | <i>HMCN1</i>   | chr1:186014831          | NM_031935.2: c.6316A>G; p.(Ile2106Val)  | rs149970975  | 0.0001201  | Het      | 1/1                  | 1/3        |          | D, P, DC                              | Novel     |
| IRD32     | <i>OPN1SW</i>  | chr7:128415610          | NM_001708.2: c.235G>A; p.(Gly79Arg)     | rs104894031  | 0.001592   | Het      | 2/3                  | 1/1        |          | D, P, A                               | [1]       |

|       |               |                 |                                              |                 |                |     |     |     |     |          |         |
|-------|---------------|-----------------|----------------------------------------------|-----------------|----------------|-----|-----|-----|-----|----------|---------|
| IRD34 | <i>ROM1</i>   | chr11:62381084  | NM_000327.3: c.339delG;<br>p.(Leu114Serfs*8) | rs7601552<br>76 | NA             | Het | 1/1 | 2/2 |     | D, D, DC | [2]     |
| IRD34 | <i>CAPN5</i>  | chr11:76830146  | NM_004055.4: c.1238C>T;<br>p.(Thr413Met)     | rs3705289<br>20 | 0.0004174      | Het | 1/1 | 1/2 |     | T, B, DC | Novel   |
| IRD42 | <i>COL2A1</i> | chr12:48371204  | NM_001844.4: c.3172C>T;<br>p.(Arg1058Cys)    | rs1483506<br>40 | 0.0000803<br>8 | Het | 1/1 | 1/3 |     | D, D, DC | Novel   |
| IRD42 | <i>COL9A1</i> | chr6:70942400   | NM_001851.4: c.2389C>T;<br>p.(Pro797Ser)     | rs762152<br>784 | 0.000032<br>72 | Het | 1/1 | 3/3 |     | D, D, DC | Novel   |
| IRD42 | <i>PAX2</i>   | chr10:102568941 | NM_003990.4: c.936C>G;<br>p.(Asn312Lys)      | rs1997247<br>72 | 0.003375       | Het | 1/1 | 1/3 | LB  | T, B, DC | ClinVar |
| IRD43 | <i>IMPG2</i>  | chr3:100961735  | NM_016247.3: c.2819A>G;<br>p.(Gln940Arg)     | rs373286<br>123 | 0.000260<br>4  | Het | 1/1 | 1/1 |     | T, D, DC | Novel   |
| IRD45 | <i>ADGRV1</i> | chr5:89992918   | NM_032119.3: c.8110A>T;<br>p.(Ile2704Phe)    | rs3763187<br>79 | 0.001685       | Hom | 2/3 | 0/3 | VUS | D, P, DC | ClinVar |

\* At least one star status. Table S6 Abbreviations: PP: PolyPhen, MT: MutationTaster, DC: Disease Causing, A: Disease causing Automatic, D: damaging, N: neutral, B: benign, T: tolerated, NA: not available, VUS: variant of unknown significance; P, pathogenic; LP, likely pathogenic, Het: heterozygous, Hom: homozygous.

1. Weitz, C.J.; Miyake, Y.; Shinzato, K.; Montag, E.; Zrenner, E.; Went, L.N.; Nathans, J. Human tritanopia associated with two amino acid substitutions in the blue-sensitive opsin. *Am J Hum Genet* **1992**, *50*, 498-507.
2. Boulanger-Scemama, E.; El Shamieh, S.; Démontant, V.; Condroyer, C.; Antonio, A.; Michiels, C.; Boyard, F.; Saraiva, J.P.; Letexier, M.; Souied, E.; et al. Next-generation sequencing applied to a large French cone and cone-rod dystrophy cohort: mutation spectrum and new genotype-phenotype correlation. *Orphanet J Rare Dis* **2015**, *10*, 85, doi:10.1186/s13023-015-0300-3.
